# Supplementary material for: Cunninghamella arunalokei a New Species of Cunninghamella from India Causing Disease in an Immunocompetent Individual
Source: MDPI journal article supplement (doi:10.3390/jof7080670), 2021-08-19
Supplement: s1 [file s1]

Supplementary Material

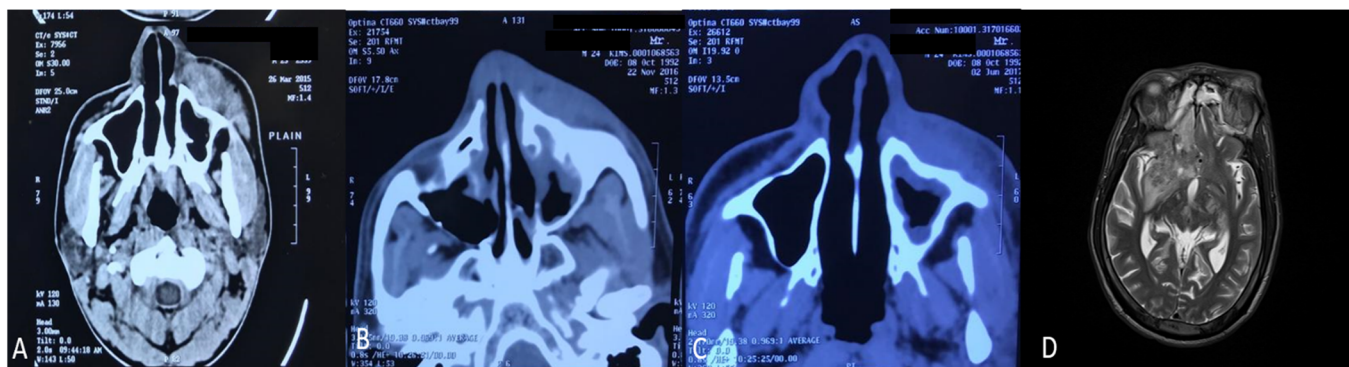

**Figure S1.** Radiological progression of the lesion over the five years (A) lesion in the skin and subcutaneous tissue of left side of the face (2015) (B, C) progression with involvement of the left maxillary sinus mucosa thickening (2016 & 2017) & (D) Intracranial extension in 2021.

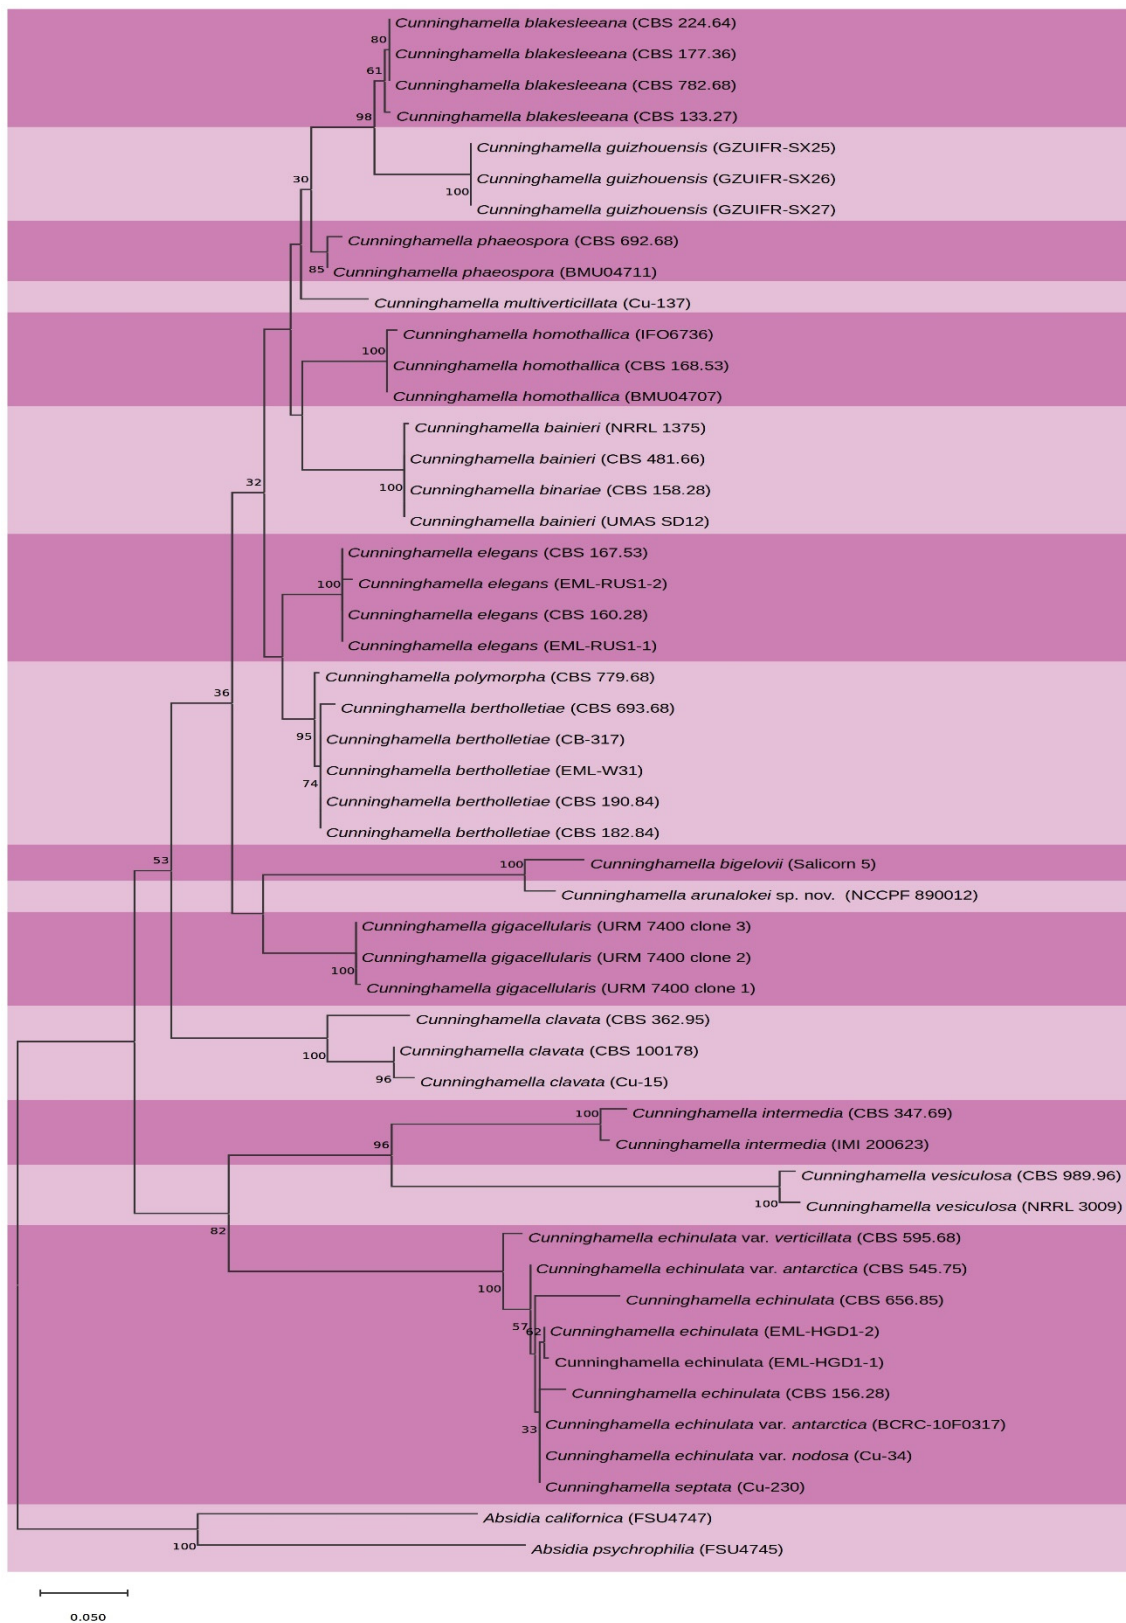

**Figure S2:** Molecular phylogenetic analysis of *Cunninghamella* species using internal transcribed spacer region. The evolutionary history was inferred by using the Maximum Likelihood method based on the Kimura 2-parameter model. All positions containing gaps and missing data were eliminated.

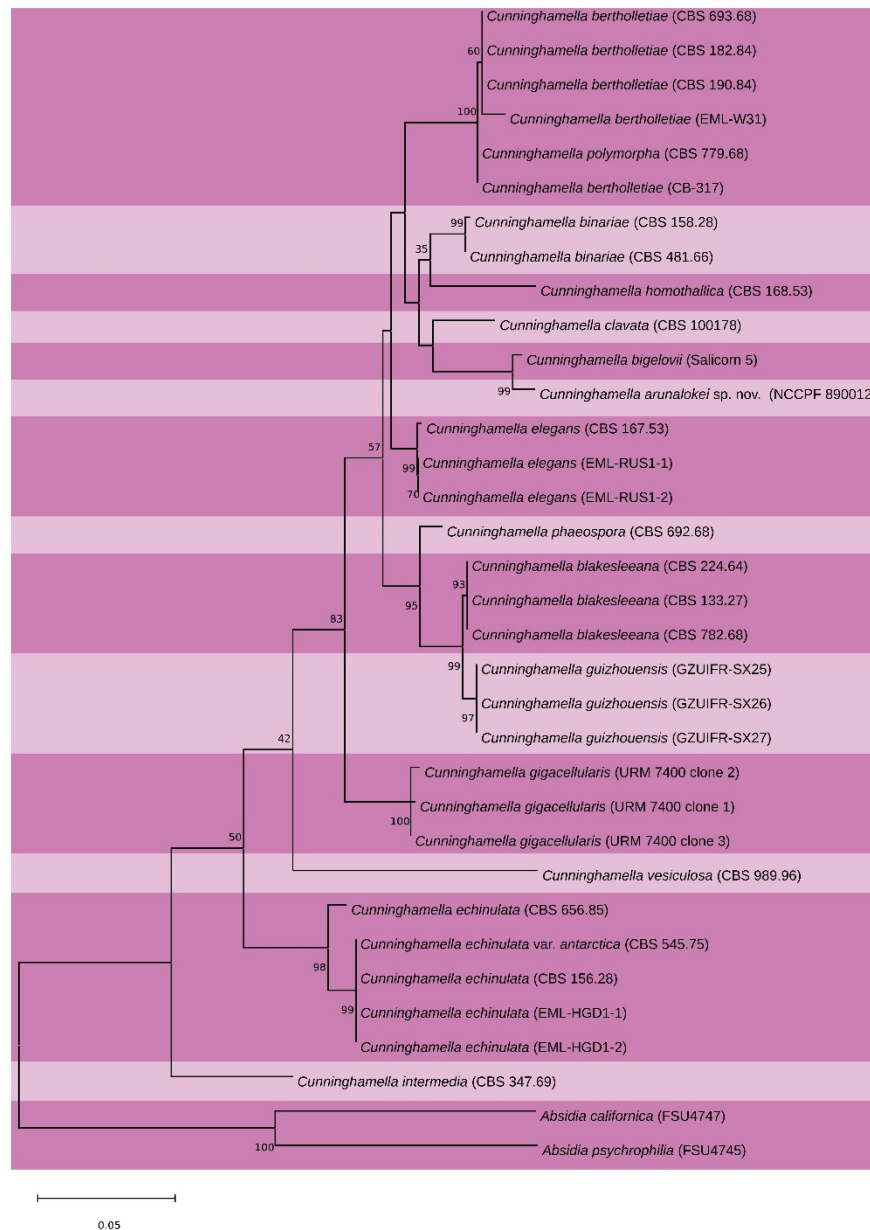

**Figure S3:** Molecular phylogenetic analysis of *Cunninghamella* species using 28S large ribosomal subunit region. The evolutionary history was inferred by using the Maximum Likelihood method based on the Kimura 2-parameter model. All positions containing gaps and missing data were eliminated.

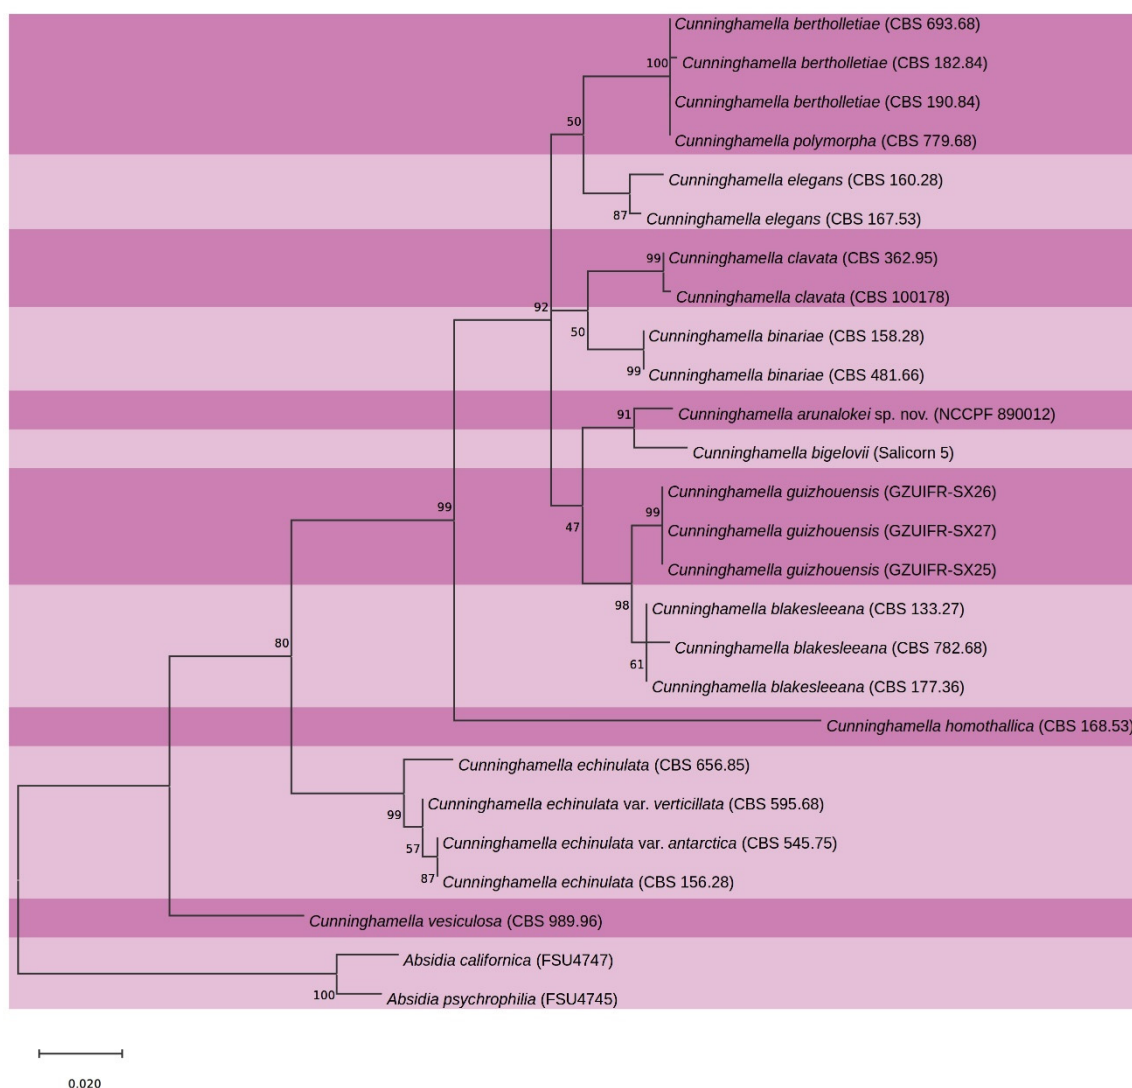

**Figure S4.** Molecular phylogenetic analysis of *Cunninghamella* species using EF-1 alpha region. The evolutionary history was inferred by using the Maximum Likelihood method based on the Kimura 2-parameter model. All positions containing gaps and missing data were eliminated.

**Table S1.** Accession numbers of the internal transcribed spacer (ITS) region, large ribosomal subunit (28S) and translation elongation factor-1 alpha (EF-1alpha) of the various *Cunninghamella* species used for phylogenetic analysis in this study.

| S. No | Species                                       | Strain ID        | ITS        | 28S         | EF-1alpha  |
|-------|-----------------------------------------------|------------------|------------|-------------|------------|
| 1     | <i>C. bainieri</i>                            | NRRL 1375        | AF254935.1 | NA          | NA         |
| 2     | <i>C. bainieri</i>                            | UMAS SD12        | KF201293.1 | NA          | NA         |
| 3     | <i>C. bertholletiae</i>                       | CB-317           | KX638508.1 | KX638507.1  | NA         |
| 4     | <i>C. bertholletiae</i>                       | CBS 182.84       | JN205877.1 | MH873434.1  | KJ156481.1 |
| 5     | <i>C. bertholletiae</i>                       | CBS 190.84       | JN205878.1 | HM849701.1  | KJ156485.1 |
| 6     | <i>C. bertholletiae</i>                       | CBS 693.68       | AF254931.1 | MH870924.1  | KJ156490.1 |
| 7     | <i>C. bertholletiae</i>                       | EML-W31          | MF806022.1 | MF806029.1  | NA         |
| 8     | <i>C. bigelovii</i>                           | Salicorn 5       | KJ013403.1 | KJ013405.1  | KJ395944.1 |
| 9     | <i>C. echinulata</i>                          | EML-HGD1-2       | MF806024.1 | MF806026.1  | NA         |
| 10    | <i>C. echinulata</i> var. <i>antarctica</i>   | CBS 545.75       | AF254938.1 | JN206597.1  | KJ156492.1 |
| 11    | <i>C. elegans</i>                             | EML-RUS1-2       | MF806021.1 | MF806028.1  | NA         |
| 12    | <i>A. psychrophilia</i>                       | FSU4745          | AY944874.1 | EU736306.1  | EU736252.1 |
| 13    | <i>A. californica</i>                         | FSU4747          | AY944872.1 | EU736300.1  | EU736246.1 |
| 14    | <i>C. arunalokei</i>                          | IL3459           | MN431159.1 | MN431158.1  | This study |
| 15    | <i>C. binariae</i>                            | CBS 158.28       | JN205888.1 | JN206602.1  | KJ156486.1 |
| 16    | <i>C. blakesleeana</i>                        | CBS 133.27       | AF254932.1 | NG_063968.1 | KJ156479.1 |
| 17    | <i>C. blakesleeana</i>                        | CBS 224.64       | JN205870.1 | MH870055.1  | NA         |
| 18    | <i>C. blakesleeana</i>                        | CBS 177.36       | JN205868.1 | NA          | KJ156483.1 |
| 19    | <i>C. blakesleeana</i>                        | CBS 782.68       | JN205869.1 | JN206601.1  | KJ156478.1 |
| 20    | <i>C. clavata</i>                             | CBS 100178       | JN205890.1 | HM849696.1  | KJ156477.1 |
| 21    | <i>C. clavata</i>                             | CBS 362.95       | JN205891.1 | NA          | KJ156473.1 |
| 22    | <i>C. clavata</i>                             | Cu-15            | AF254942.1 | NA          | NA         |
| 23    | <i>C. echinulata</i>                          | CBS 156.28       | JN942997.1 | JN939199.1  | KJ156500.1 |
| 24    | <i>C. echinulata</i>                          | CBS 656.85       | JN942996.1 | JN939200.1  | KJ156491.1 |
| 25    | <i>C. echinulata</i>                          | EML-HGD1-1       | MF806020.1 | MF806025.1  | NA         |
| 26    | <i>C. echinulata</i> var. <i>antarctica</i>   | BCRC-10F0317     | JQ678764.1 | NA          | NA         |
| 27    | <i>C. echinulata</i> var. <i>nodosa</i>       | Cu-34            | AF346407.1 | NA          | NA         |
| 28    | <i>C. echinulata</i> var. <i>verticillata</i> | CBS 595.68       | AF254937.1 | NA          | KJ156475.1 |
| 29    | <i>C. elegans</i>                             | CBS 167.53       | JN205882.1 | HM849700.1  | KJ156494.1 |
| 30    | <i>C. elegans</i>                             | CBS 481.66       | JN205889.1 | JN206603.1  | KJ156495.1 |
| 31    | <i>C. elegans</i>                             | EML-RUS1-1       | MF806023.1 | MF806027.1  | NA         |
| 32    | <i>C. elegans</i>                             | CBS 160.28       | AF254928.1 | NA          | KJ156470.1 |
| 33    | <i>C. gigacellularis</i>                      | URM 7400 clone 1 | KX238886.1 | KX238889.1  | NA         |
| 34    | <i>C. gigacellularis</i>                      | URM 7400 clone 2 | KX238887.1 | KX238890.1  | NA         |
| 35    | <i>C. gigacellularis</i>                      | URM 7400 clone 3 | KX238888.1 | KX238891.1  | NA         |
| 36    | <i>C. guizhouensis</i>                        | GZUIFR-SX25      | MN908596.1 | MN908599.1  | MN912633.1 |
| 37    | <i>C. guizhouensis</i>                        | GZUIFR-SX26      | MN908597.1 | MN908600.1  | MN912634.1 |
| 38    | <i>C. guizhouensis</i>                        | GZUIFR-SX27      | MN908598.1 | MN908601.1  | MN912635.1 |
| 39    | <i>C. homothallica</i>                        | CBS 168.53       | JN205863.1 | JN206605.1  | KJ156498.1 |
| 40    | <i>C. homothallica</i>                        | BMU04707         | MN217567.1 | NA          | NA         |
| 41    | <i>C. homothallica</i>                        | IFO6736          | AF254941.1 | NA          | NA         |
| 42    | <i>C. intermedia</i>                          | CBS 347.69       | AF254940.1 | JN206606.1  | NA         |
| 43    | <i>C. intermedia</i>                          | IMI 200623       | AF254939.1 | NA          | NA         |
| 44    | <i>C. multiverticillata</i>                   | Cu-137           | AF254933.1 | NA          | NA         |
| 45    | <i>C. phaeospora</i>                          | BMU04711         | MG583991.1 | NA          | NA         |
| 46    | <i>C. phaeospora</i>                          | CBS 692.68       | AF254934.1 | HM849697.1  | NA         |

|    |                      |            |            |            |            |
|----|----------------------|------------|------------|------------|------------|
| 47 | <i>C. polymorpha</i> | CBS 779.68 | JN205874.1 | JN206599.1 | KJ156471.1 |
| 48 | <i>C. septata</i>    | Cu-230     | AF346408.1 | NA         | NA         |
| 49 | <i>C. vesiculosa</i> | CBS 989.96 | JN205897.1 | HM849693.1 | KJ156474.1 |
| 50 | <i>C. vesiculosa</i> | NRRL 3009  | AF254943.1 | NA         | NA         |

**Table S2.** Details of various Mucorales genomes used for whole-genome phylogeny in this study.

| Name                            | Strain                           | NCBI Genome Accession | SRA ID      | SRX ID     |
|---------------------------------|----------------------------------|-----------------------|-------------|------------|
| <i>A. glauca</i>                | CBS 101.48 substr. RVII-324 met- | GCA_900079185.1       | -           | -          |
| <i>A. repens</i>                | NRRL 1336                        | GCA_002105175.1       | -           | -          |
| <i>A. elegans</i>               | B7760                            | GCA_000696995.1       | -           | -          |
| <i>A. ossiformis</i>            | NRRL A-21654                     | GCA_014839865.1       | -           | -          |
| <i>A. trapeziformis</i>         | B9324                            | GCA_000696975.1       | -           | -          |
| <i>A. variabilis</i>            | NCCPF 102052                     | GCA_002749535.1       | -           | -          |
| <i>C. cucurbitarum</i>          | KUS-F28377                       | GCA_001683725.1       | -           | -          |
| <i>C. recurvatus</i>            | B5483                            | GCA_000697235.1       | -           | -          |
| <i>C. antarctica</i>            | NRRL 6534                        | -                     | SRR7686432  | SRX4546928 |
| <i>C. arunalokei</i> sp. nov.   | IL3459                           | This study            | This study  | This study |
| <i>C. bertholletiae</i>         | 175                              | GCA_000697215.1       | -           | -          |
| <i>C. bertholletiae</i>         | B7461                            | GCA_000697315.1       | -           | -          |
| <i>C. bertholletiae</i>         | NRRL 1380                        | -                     | SRR9718426  | SRX6476271 |
| <i>C. bertholletiae</i>         | NRRL 1377                        | -                     | SRR9719771  | SRX6477469 |
| <i>C. echinulata</i>            | RSA 2017+                        | -                     | SRR10125925 | SRX6854350 |
| <i>C. echinulata</i>            | RSA 2018-                        | -                     | SRR10125928 | SRX6854353 |
| <i>C. echinulata</i>            | NRRL 1385                        | -                     | SRR9719880  | SRX6477578 |
| <i>C. echinulata</i>            | NRRL 1386                        | -                     | SRR9720690  | SRX6478239 |
| <i>C. echinulata</i>            | NRRL 1387                        | -                     | SRR9721137  | SRX6478686 |
| <i>C. elegans</i>               | NRRL 1392                        | -                     | SRR9719892  | SRX6477590 |
| <i>C. elegans</i>               | NRRL 1388                        | -                     | SRR9719893  | SRX6477591 |
| <i>C. elegans</i>               | NRRL 1390                        | -                     | SRR9719896  | SRX6477594 |
| <i>C. elegans</i>               | NRRL 1391                        | -                     | SRR9719906  | SRX6477604 |
| <i>C. elegans</i>               | NRRL 1393                        | -                     | SRR9719909  | SRX6477607 |
| <i>C. polymorpha</i>            | NRRL 6428                        | -                     | SRR12691406 | SRX9171364 |
| <i>Gigaspora rosea</i>          | DAOM 194757                      | GCA_003550325.1       | -           | -          |
| <i>Glomus cerebriforme</i>      | DAOM 227022                      | GCA_003550305.1       | -           | -          |
| <i>Gongronella</i> sp.          | w5                               | GCA_001650995.1       | -           | -          |
| <i>Hesseltinella vesiculosa</i> | NRRL 3301                        | GCA_002104935.1       | -           | -          |
| <i>Lichtheimia corymbifera</i>  | FSU 9682                         | GCA_000723665.1       | -           | -          |
| <i>Lichtheimia ramosa</i>       | KPH11                            | GCA_008728235.1       | -           | -          |
| <i>Linnemannia elongata</i>     | AG-77                            | GCA_001651415.1       | -           | -          |
| <i>Mortierella alpina</i>       | ATCC 32222                       | GCA_000240685.2       | -           | -          |
| <i>Mortierella hygrophila</i>   | NRRL 2591                        | GCA_015680625.1       | -           | -          |
| <i>Mucor ambiguus</i>           | NBRC 6742                        | GCA_000950595.1       | -           | -          |
| <i>Mucor circinelloides</i>     | JCM 22480                        | GCA_001599575.1       | -           | -          |
| <i>Mucor irregularis</i>        | B50                              | GCA_000587855.1       | -           | -          |
| <i>Mucor lusitanicus</i>        | MU402                            | GCA_010203745.1       | -           | -          |
| <i>Mucor racemosus</i>          | B9645                            | GCA_000697255.1       | -           | -          |
| <i>Mucor velutinosus</i>        | B5328                            | GCA_000696895.1       | -           | -          |

|                                       |              |                 |   |   |
|---------------------------------------|--------------|-----------------|---|---|
| <i>Phycomyces blakesleeanus</i>       | NRRL 1555(-) | GCA_001638985.2 | - | - |
| <i>Podila verticillata</i>            | NRRL 6337    | GCA_000739165.1 | - | - |
| <i>Rhizomucor miehei</i>              | CAU432       | GCA_000611695.1 | - | - |
| <i>Rhizomucor pusillus</i>            | -            | GCA_900175165.2 | - | - |
| <i>Rhizophagus irregularis</i>        | DAOM 197198  | GCA_000439145.3 | - | - |
| <i>Rhizopus azygosporus</i>           | CBS 357.93   | GCA_003325435.1 | - | - |
| <i>Rhizopus delemar</i>               | RA 99-880    | GCA_000149305.1 | - | - |
| <i>Rhizopus microsporus</i>           | ATCC 52813   | GCA_002708625.1 | - | - |
| <i>Rhizopus oryzae</i>                | 99-892       | GCA_000697725.1 | - | - |
| <i>Rhizopus stolonifer</i>            | B9770        | GCA_000697035.1 | - | - |
| <i>Saksenaea oblongispora</i>         | B3353        | GCA_000697495.1 | - | - |
| <i>Saksenaea vasiformis</i>           | B4078        | GCA_000697055.1 | - | - |
| <i>Syncephalastrum contaminatum</i>   | UoMD18-1     | GCA_013461545.1 | - | - |
| <i>Syncephalastrum monosporum</i>     | B8922        | GCA_000697355.1 | - | - |
| <i>Syncephalastrum racemosum</i>      | NRRL 2496    | GCA_002105135.1 | - | - |
| <i>Thermomucor indicae-seudaticae</i> | HACC 243     | GCA_000787465.1 | - | - |
